# Supplementary material for: Synthesis of phosphine substituted β-diketiminate based isomeric Ge(ii) complexes
Source: Royal Society of Chemistry journal article supplement (doi:10.1039/b915403e), 2009-11-09
Supplement: b915403e.pdf [file b915403e.pdf]

Supplementary Material

# Synthesis of Phosphine Substituted $\beta$ -Diketiminato Based Isomeric Ge(II) Complexes

N. Dastagiri Reddy, Anukul Jana, Herbert W. Roesky, Prinson P. Samuel and Carola Schulzke

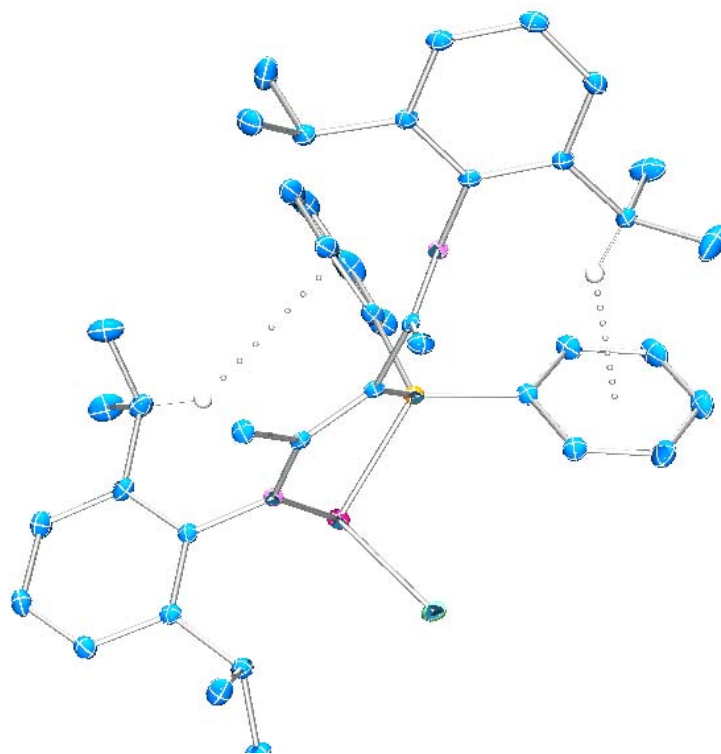

ORTEP diagram of *N,P* chelate complex,  $\text{Ph}_2\text{PC}[\text{C}(\text{Me})\text{N}(\text{Dipp})]_2\text{GeCl } \mathbf{2}$  showing proximity of methylene protons to the phenyl groups. Distances (dotted bonds) from the protons to the center of the phenyl groups: 2.858 Å and 3.466 Å. These protons appear at  $\delta$  1.70 and 2.55 ppm in the  $^1\text{H}$  NMR spectrum.
